# Supplementary material
Source: Springer Nature journal article supplement (https://www.springermedizin.de/resource/supplementary/12906_2006_118_MOESM14_ESM.pdf/9524108)

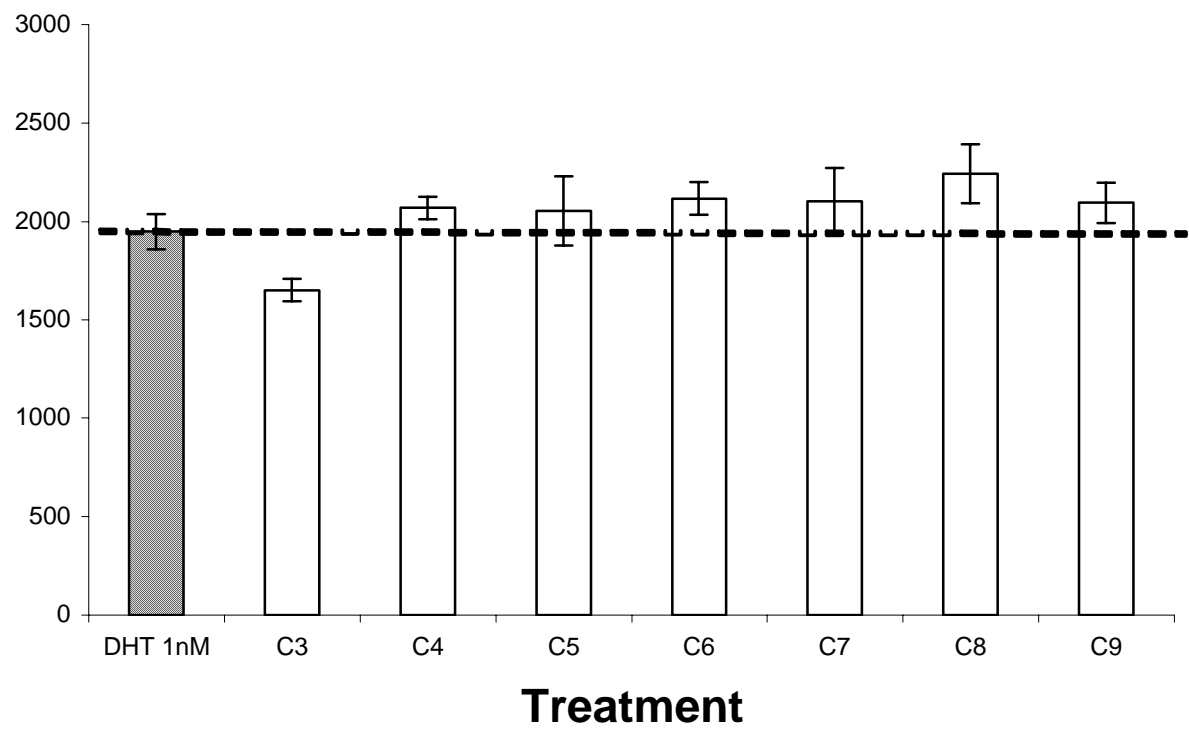

Supplement: MOESM14 [file 9524108]
